# Supplementary material
Source: PubMed Central journal article supplement (PMC2582275)
Supplement: 0801609105_0801609105SI.pdf [file 0801609105_0801609105SI.pdf]

# Supporting Information

Patel *et al.* 10.1073/pnas.0801609105

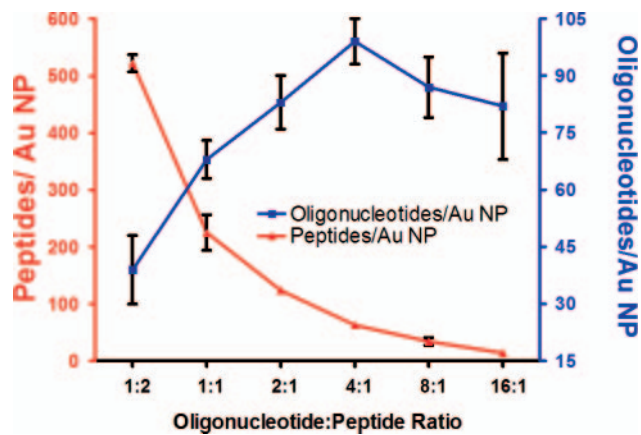

**Fig. S1.** Oligonucleotide and peptide density on 13-nm gold nanoparticles. Nanoparticle conjugates were prepared with oligonucleotides containing a 3' thiol terminus and fluorescein-labeled peptide using the stoichiometries indicated on the x-axis. DNA loading (blue line) is plotted on the y-axis on the right, and peptide loading (red line) is plotted on the y-axis on the left. The 1:1 stoichiometry yielded a conjugate functionalized with  $\approx 50\%$  of the theoretical maximum of each biomolecule.

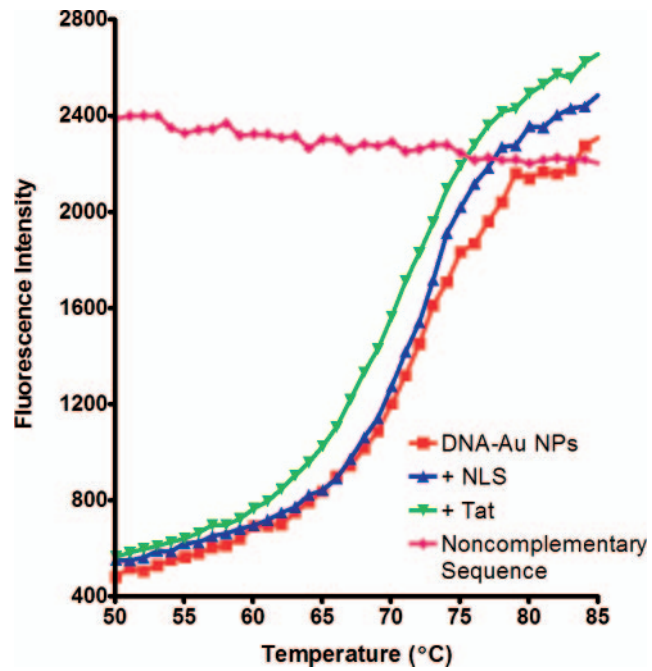

**Fig. S2.** Fluorescence-melting profile of peptide-ASNPs (Tat or NLS) compared with ASNPs.  $T_m$ : ASNPs =  $72 \pm 0.7^\circ\text{C}$ ; NLS peptide + ASNPs =  $73 \pm 0.4^\circ\text{C}$ ; Tat peptide + ASNPs =  $71 \pm 0.2^\circ\text{C}$ . Noncomplementary oligonucleotides did not display a melting curve.

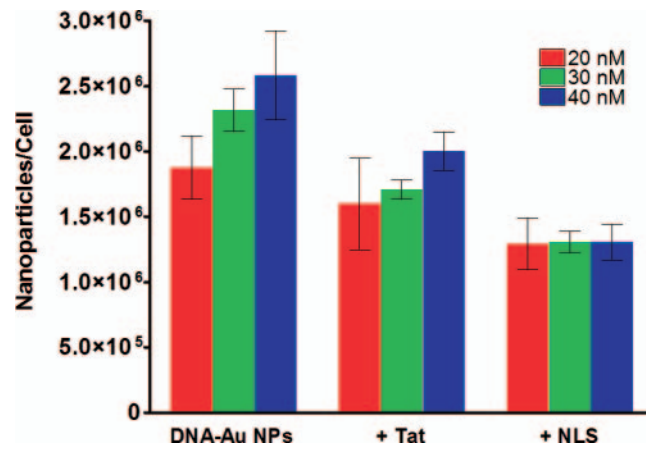

Fig. S3. Nanoparticle uptake in HeLa cells based on intercellular gold content determined by ICP-MS.

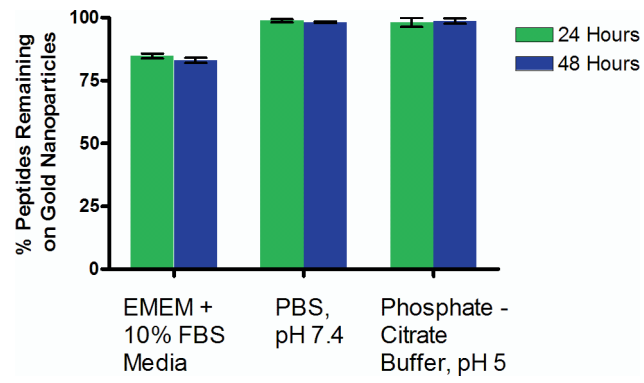

**Fig. S4.** Stability of peptide attachment on gold nanoparticles in various media and buffer conditions at 37°C. Fluorescent measurements were performed as described in *Materials and Methods* section.

**Table S1. Dynamic light-scattering and zeta-potential data from gold nanoparticles conjugated with oligonucleotides and from oligonucleotides and peptides (1:1 stoichiometry)**

| Conjugate     | 13-nm Gold core |                     | 5-nm Gold core |                     |
|---------------|-----------------|---------------------|----------------|---------------------|
|               | Size (nm)       | Zeta potential (mV) | Size (nm)      | Zeta potential (mV) |
| DNA-Au NPs    | 33.77 ± 0.33    | -31 ± 0.4           | 23.6 ± 0.49    | -45.9 ± 0.80        |
| + Tat peptide | 35.64 ± 0.86    | -22 ± 2.2           | 21.0 ± 1.0     | -40.9 ± 1.1         |
| + NLS peptide | 33.48 ± 0.49    | -25 ± 2.8           | 23.7 ± 0.71    | -43.1 ± 1.2         |

Error bars indicate standard deviation from 3 independent measurements.

**Table S2. Gold plasmon peak of nanoparticle conjugates prepared with different concentrations of NaCl added before the addition of oligonucleotides and peptides**

| NaCl   | Gold plasmon peak (nm) |               |               |
|--------|------------------------|---------------|---------------|
|        | Oligonucleotide        | + Tat peptide | + NLS peptide |
| 0 mM   | 524                    | 544           | 544           |
| 50 mM  | 524                    | 541           | 542           |
| 100 mM | 524                    | 539           | 534           |
| 150 mM | 524                    | 536           | 532           |
| 200 mM | 524                    | 524           | 524           |

Stable 13-nm gold nanoparticles functionalized with oligonucleotides have a plasmon peak of 524 nm (bold).

**Table 3. HeLa cell viability 48 h after treatment with ASNPs, peptide-ASNPs, and controls**

| Sequence           | Sample     | Treatment concentration |            |            |
|--------------------|------------|-------------------------|------------|------------|
|                    |            | 20 nM                   | 30 nM      | 40 nM      |
| Antisense Sequence | DNA-Au NPs | 97.8 ± 1.0              | 97.9 ± 1.4 | 98.1 ± 0.8 |
|                    | + Tat      | 97.2 ± 1.4              | 85.5 ± 1.5 | 73.4 ± 3.8 |
|                    | + NLS      | 98.2 ± 2.0              | 82.8 ± 2.6 | 55.9 ± 2.6 |
| Control Sequence   | DNA-Au NPs | 97.7 ± 0.9              | 98.0 ± 0.3 | 98.0 ± 0.7 |
|                    | + Tat      | 97.7 ± 0.6              | 98.6 ± 2.0 | 97.9 ± 0.1 |
|                    | + NLS      | 97.6 ± 1.6              | 97.3 ± 0.5 | 97.0 ± 3.1 |

All numbers are % viable cells expressed as average ± standard deviation from at least 3 experiments. ASNPs contained anti-GAPDH sequence; Controls contained a noncomplementary sequence.
